# Supplementary material for: Seabuckthorn berry polysaccharide protects against carbon tetrachloride-induced hepatotoxicity in mice via anti-oxidative and anti-inflammatory activities
Source: Royal Society of Chemistry journal article supplement (doi:10.1039/c7fo00399d), 2017-01-01
Supplement: c7fo00399d1.pdf [file c7fo00399d1.pdf]

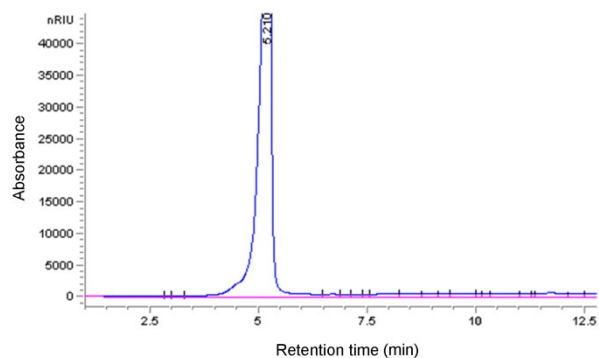

S1 HPLC chromatogram of SP. The polysaccharide in SP was detected by a refractive index detector system.

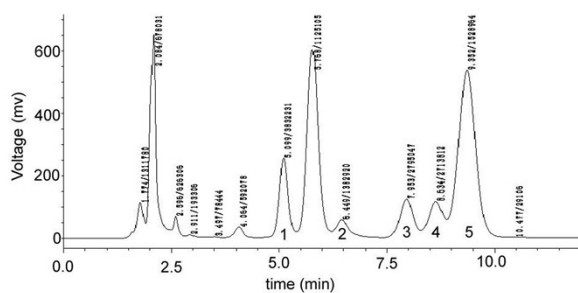

S2 HPLC chromatograms of monosaccharides in SP. SP was hydrolyzed, PMP-labeled and analyzed by HPLC.

1, Mannose, 2, Arabinose, 3, Glucose, 4, Galactose, 5, Rhamnose
